# Supplementary material for: Redefining metamorphosis in spiny lobsters: molecular analysis of the phyllosoma to puerulus transition in Sagmariasus verreauxi
Source: PubMed Central journal article supplement (PMC4550925; doi:10.1038/srep13537), 2015-08-27
Supplement: srep13537-s1.pdf [file srep13537-s1.pdf]

Supplementary data for the manuscript titled: 'Redefining metamorphosis in spiny lobsters: molecular analysis of the phyllosoma to puerulus transition in *Sagmariasus verreauxi*' (Authors: Tomer Ventura, Quinn P. Fitzgibbon, Stephen C. Battaglione and Abigail Elizur)

Includes: Table S1, Figure S1-S2. Table S2 (a large dataset) is submitted separately as an excel file.

**Table S1: List of proteins used in the phylogenetic trees in Figures 4, 5, 6**

| Species                          | Common name                  | Protein                     | Accession Number<br>(NCBI GenBank) | Figure |
|----------------------------------|------------------------------|-----------------------------|------------------------------------|--------|
| <i>Drosophila melanogaster</i>   | Common fruit fly             | CYP6A2                      | AAB36782                           | 4C     |
| <i>Bombyx mori</i>               | The silk moth                | CYP303a1-like               | XP_004932789                       | 4C     |
| <i>Acyrtosiphon pisum</i>        | Pea aphid                    | CYP303a1                    | XP_001951093                       | 4C     |
| <i>Tribolium castaneum</i>       | Flour beetle                 | CYP303a1                    | XP_008200616                       | 4C     |
| <i>Drosophila melanogaster</i>   | Common fruit fly             | Cyp303a1, isoform B         | NP_001285977                       | 4C     |
| <i>Musca domestica</i>           | Common house fly             | CYP303a1-like               | XP_005184173                       | 4C     |
| <i>Macrobrachium rosenbergii</i> | Giant freshwater prawn       | Mr-CYP15A1                  | na                                 | 4C     |
| <i>Drosophila melanogaster</i>   | Common fruit fly             | Cyp305a1                    | NP_649151                          | 4C     |
| <i>Ceratitis capitata</i>        | Mediterranean fruit fly      | CYP305a1-like               | XP_004537734                       | 4C     |
| <i>Diploptera punctata</i>       | Cockroach                    | CYP15A1                     | AAS13464                           | 4C     |
| <i>Reticulitermes flavipes</i>   | Eastern subterranean termite | CYP15A1                     | C1K313                             | 4C     |
| <i>Schistocerca gregaria</i>     | Desert locust                | Methyl farnesoate epoxidase | ADV17351                           | 4C     |
| <i>Tribolium castaneum</i>       | Flour beetle                 | CYP15A1                     | D6WFY6                             | 4C     |
| <i>Acyrtosiphon pisum</i>        | Pea aphid                    | CYP305a1                    | XP_001952620                       | 4C     |
| <i>Apis florea</i>               | Dwarf honey bee              | CYP305a1                    | XP_003693154                       | 4C     |
| <i>Nasonia vitripennis</i>       | Parasitoid wasp              | CYP303a1                    | XP_001605585                       | 4C     |
| <i>Microplitis demolitor</i>     | Parasitoid wasp              | CYP305a1                    | XP_008549892                       | 4C     |
| <i>Metaseiulus occidentalis</i>  | Predatory mite               | CYP307a1-like               | XP_003747195                       | 4C     |
| <i>Bombus terrestris</i>         | Buff-tailed bumblebee        | CYP307a1-like               | XP_003400661                       | 4C     |
| <i>Nasonia vitripennis</i>       | Parasitoid wasp              | CYP307a1                    | XP_008211923                       | 4C     |
| <i>Tribolium castaneum</i>       | Flour beetle                 | CYP307a1                    | XP_008200059                       | 4C     |
| <i>Acyrtosiphon pisum</i>        | Pea aphid                    | CYP307a1                    | XP_008179686                       | 4C     |

**Figure S1: Length distribution of contigs and unigenes across all ten samples:**

Key to library names:

1. Intermolt phyllosoma 17: 17D, 17D.
2. 20% retracting phyllosoma 17: 17preB, 17preD.
3. 80% retracting phyllosoma 17: 17preG, 17preI.
4. Post-molt puerulus: PuPost6, PuPost7.
5. H-phase puerulus: PuH1, PuH2.

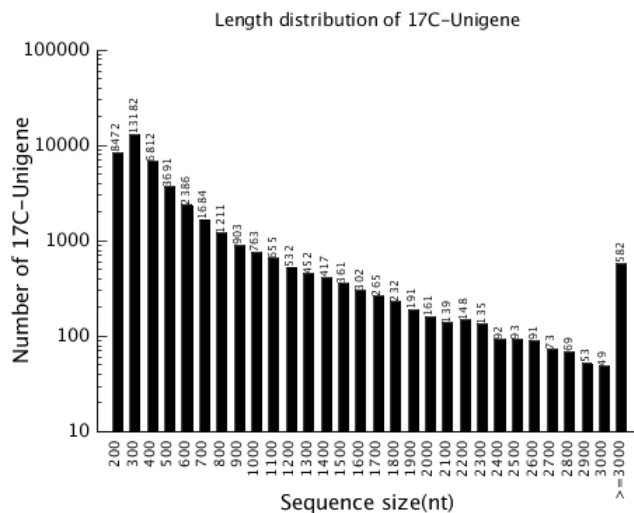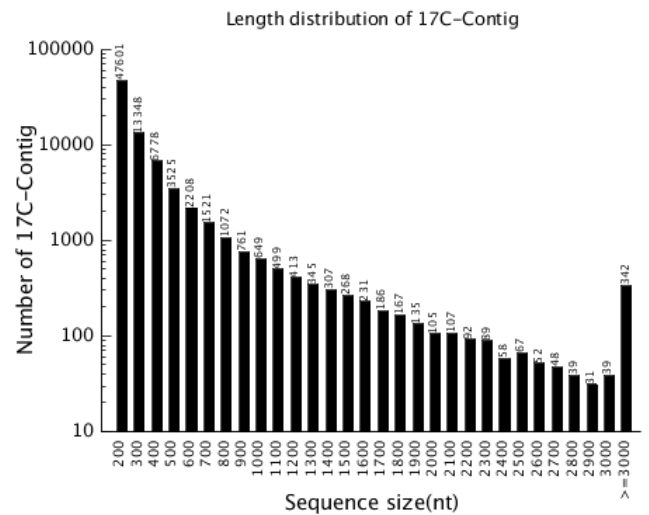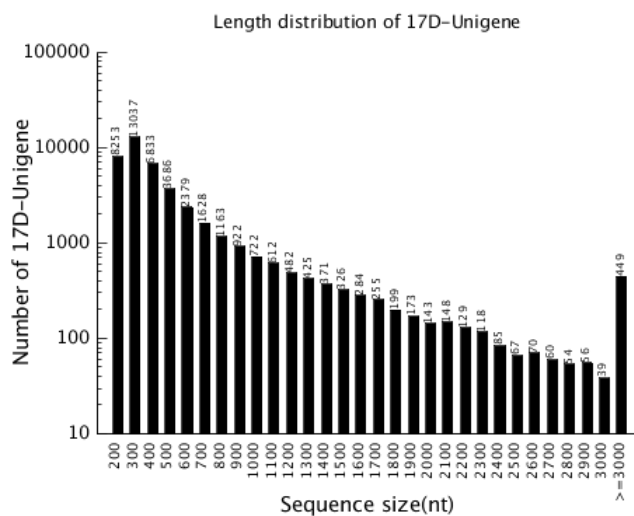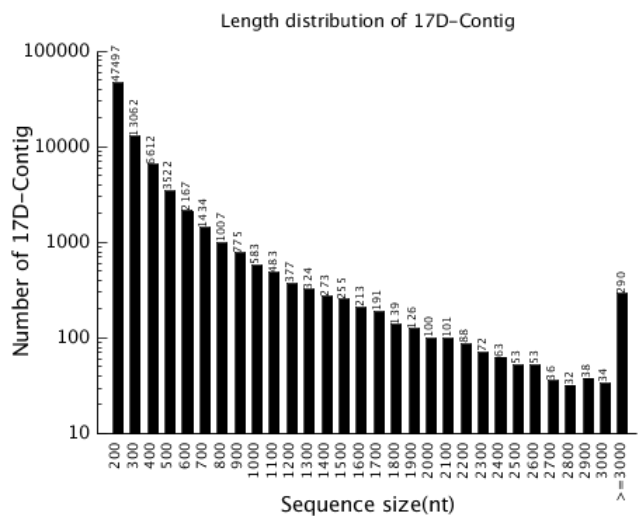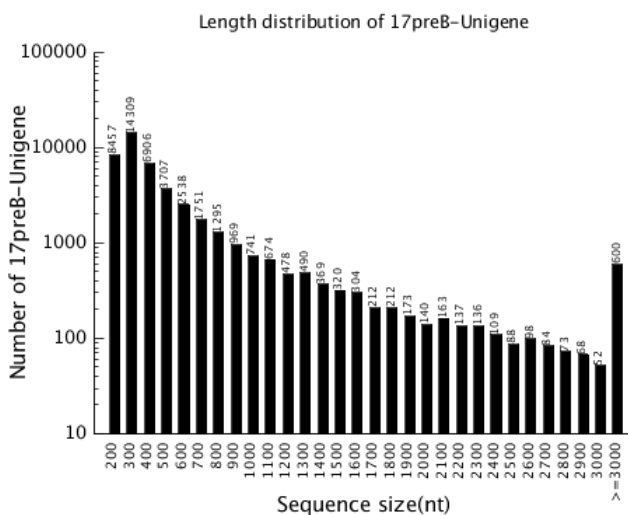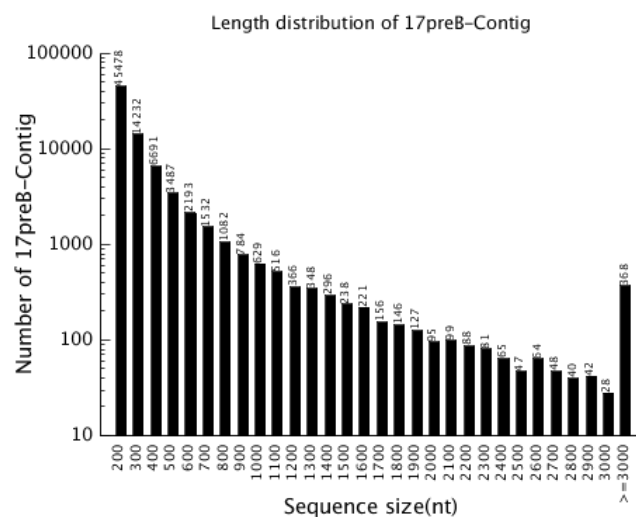

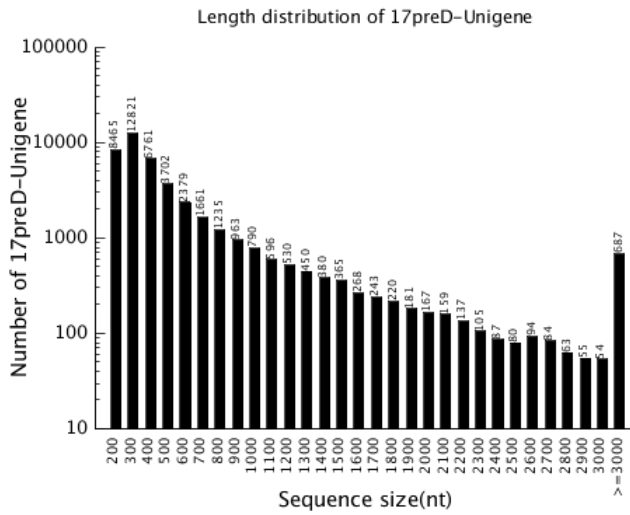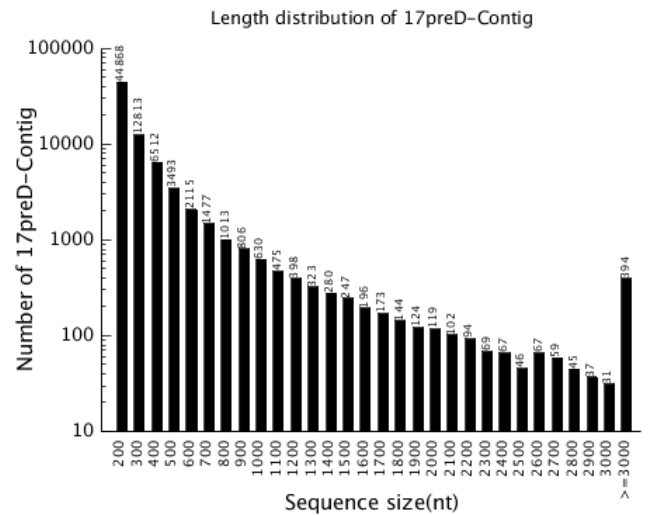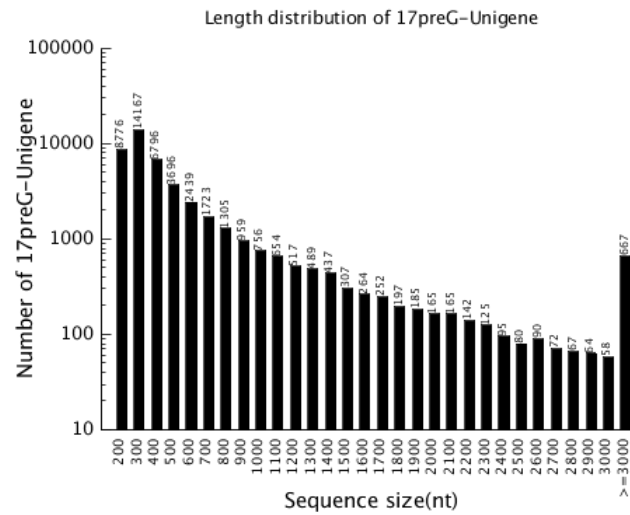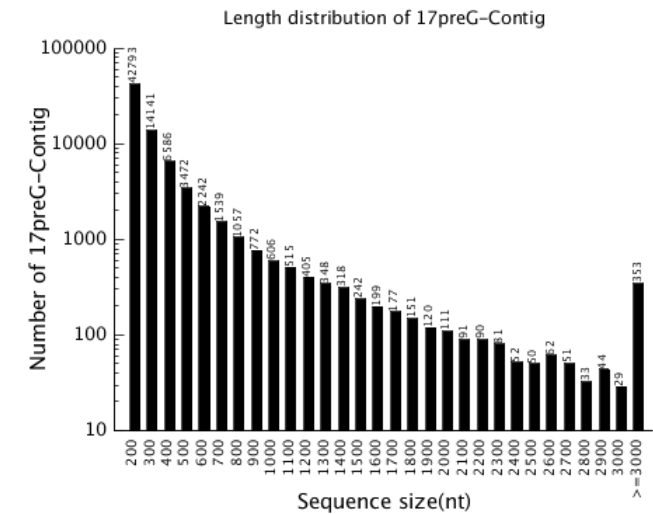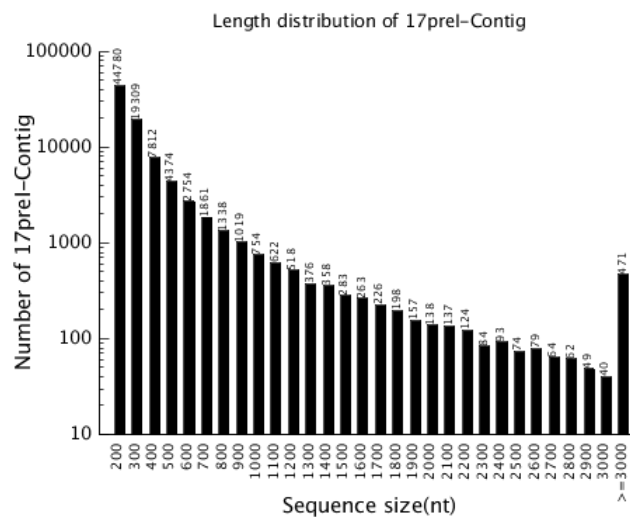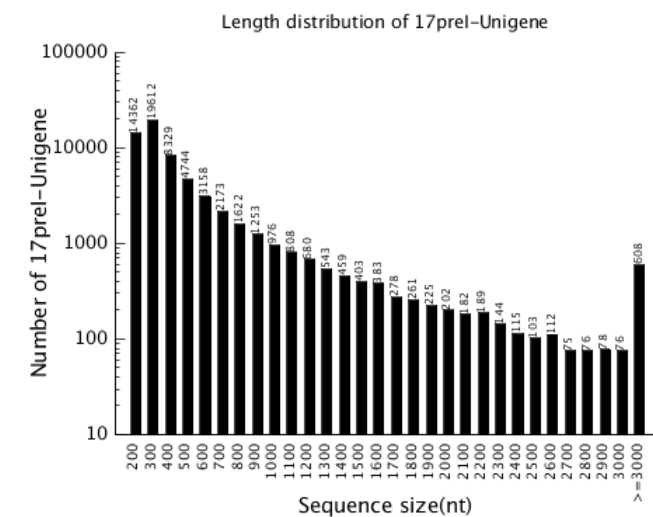

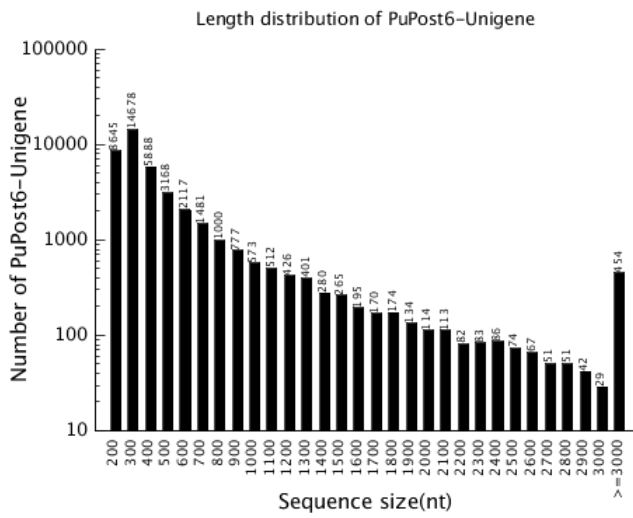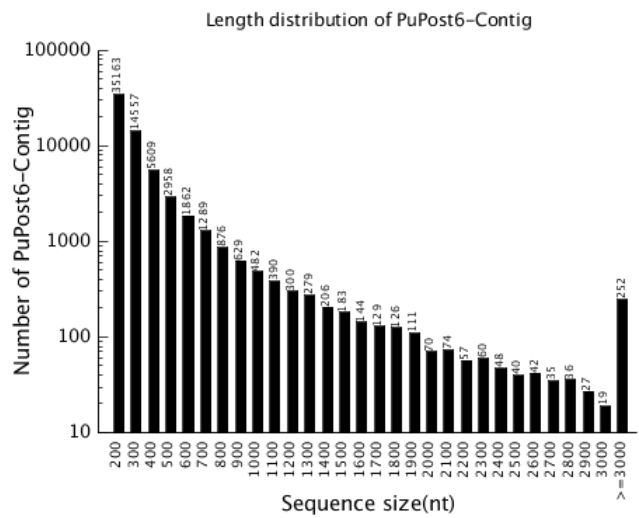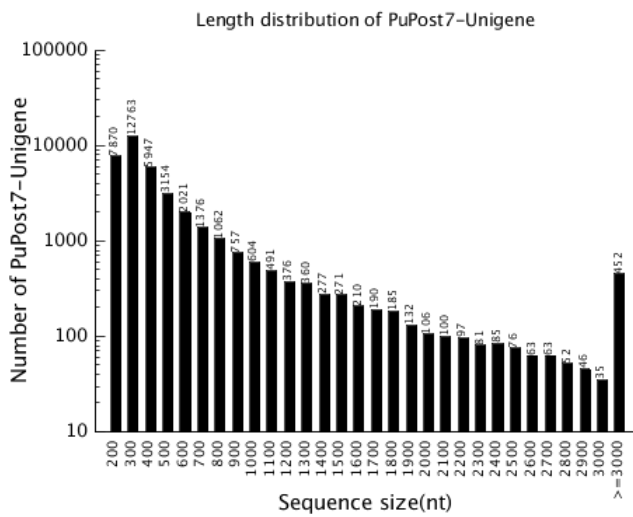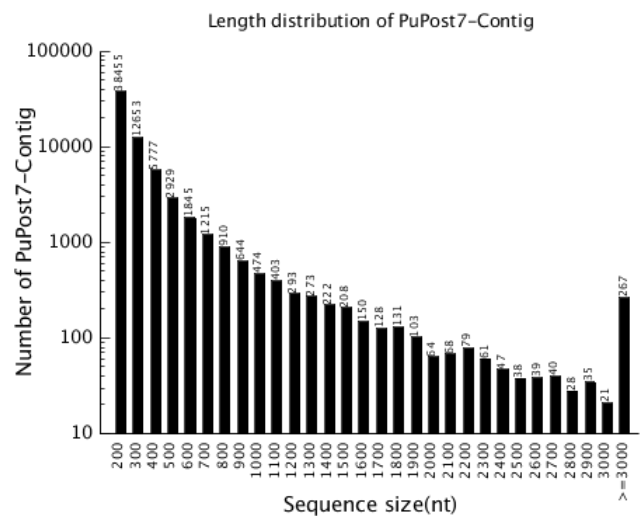

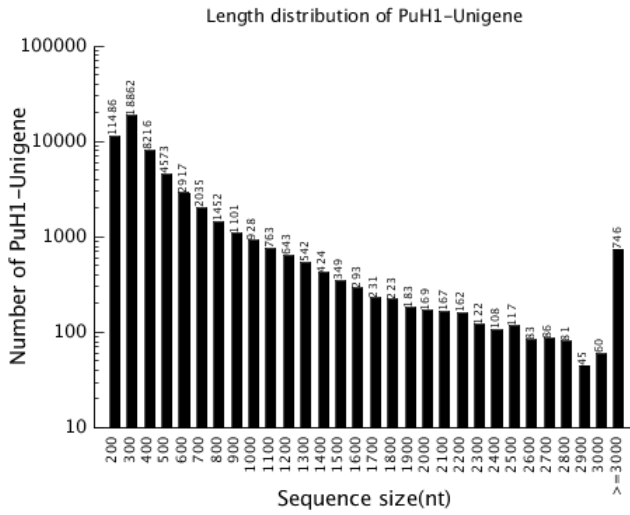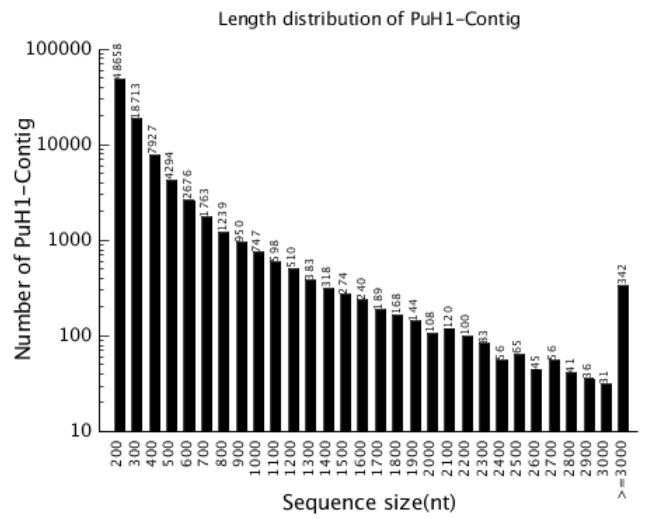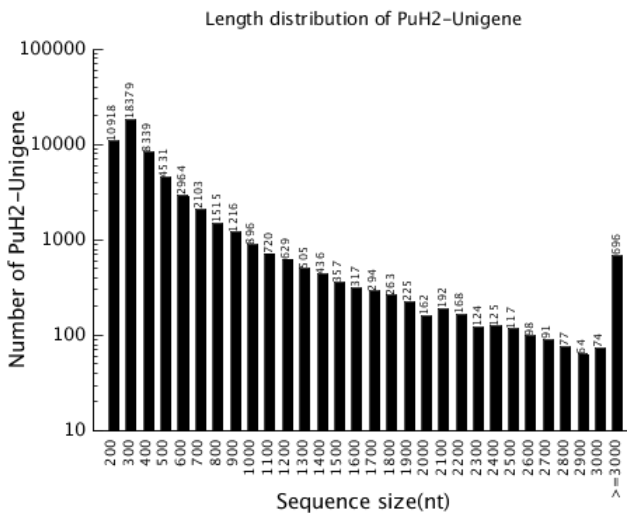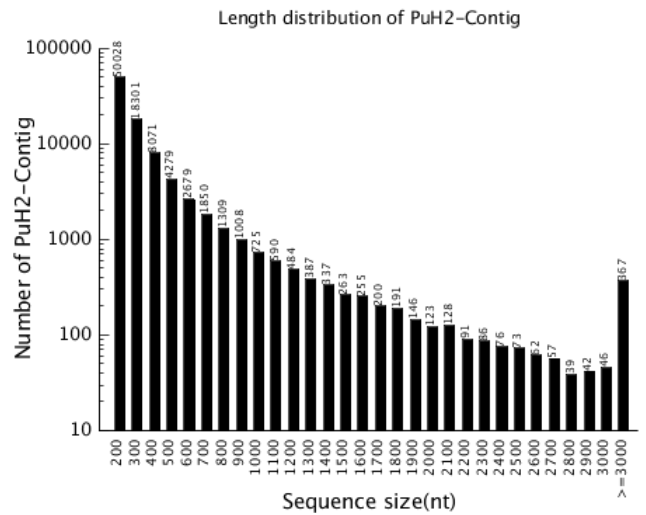

**Figure S2: Relative quantification of key genes using qPCR (columns) and RPKM values (line), throughout metamorphosis:**

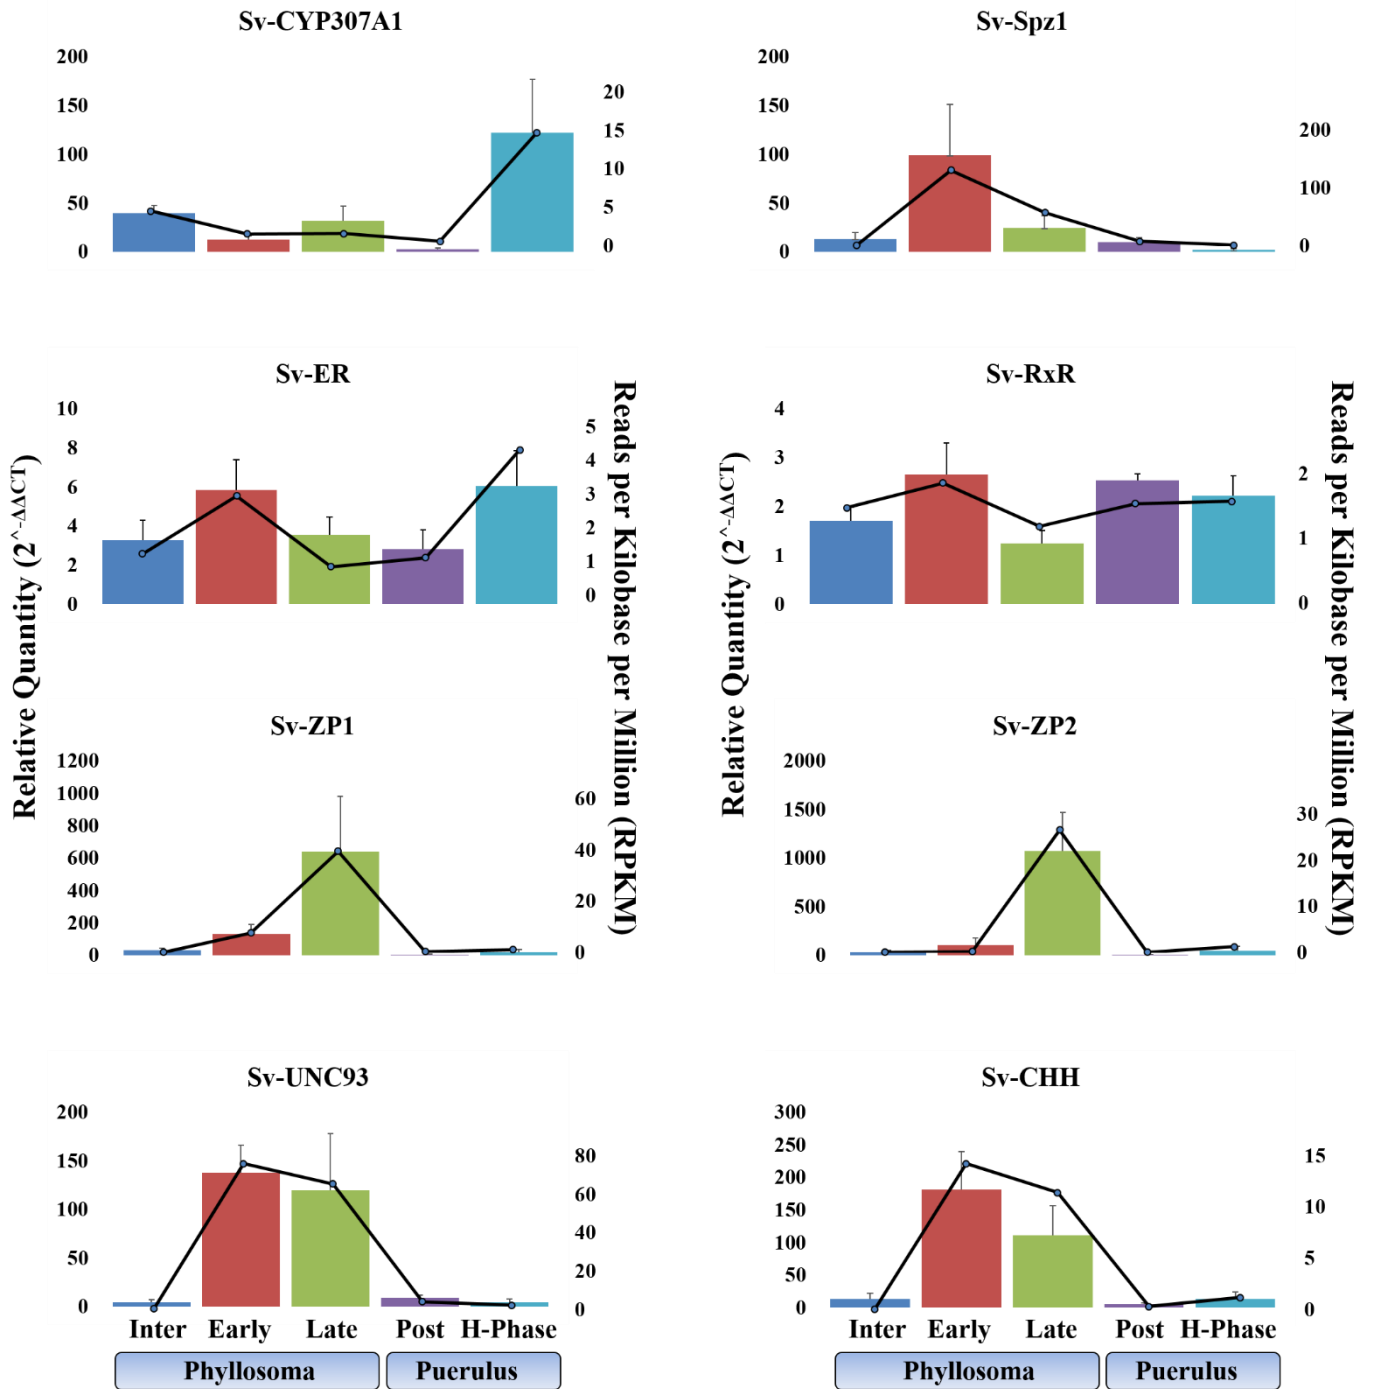

**Details of genes, primers and probes used for qPCR analysis in Figure S2:**

| <b>Gene name</b> | <b>GenBank accession no. / unigene</b> | <b>Forward primer (5' to 3')</b> | <b>Reverse primer (5' to 3')</b> | <b>Probe</b> |
|------------------|----------------------------------------|----------------------------------|----------------------------------|--------------|
| Sv-18S           | KF828103                               | ggtgcatggccgttctta               | tggagatccgtcgactagtaat           | 22           |
| Sv-FAMeT1        | Unigene44448                           | ccacgttgccctcacttc               | ttctgaacctgatggctga              | 22           |
| Sv-CYP15A1       | CL6907.Contig1                         | cgtgggtcatggacgact               | ttcagagtggcatccgtgta             | 1            |
| Sv-CYP307A1      | Unigene44916                           | ggaggatctcttgggtggat             | agggtgttggaggatgtagc             | 156          |
| Sv-ER            | CL5835.contig4                         | aacagccagtaacatcccaaa            | tcacactcaagaacaagcgact           | 142          |
| Sv-RxR           | CL4526.contig2                         | cagtcccttgtctccaccac             | acagacatgacgggcttctc             | 157          |
| Sv-ZP1           | Unigene50269                           | agcgaccccaactgtgtg               | agctgttgaggtagatgtcgaa           | 116          |
| Sv-ZP2           | Unigene30964                           | accgggccagtcatagt                | tggtggtgctgactggatta             | 78           |
| Sv-UNC93         | CL5857.Contig2                         | ccaggttggtgatgttgg               | ctctcctcgggtgcaactt              | 78           |
| Sv-Spz1          | CL5710.Contig1_All                     | ctaccgacatcccatgtaacac           | agcagttctccagtcatctcg            | 86           |
| Sv-CHH           | Unigene30324                           | gagggaagccacgagagac              | ggtgaacctgacaacaccaa             | 51           |
